# Supplementary material
Source: Springer Nature journal article supplement (https://www.springermedizin.de/resource/supplementary/12968_2012_2616_MOESM3_ESM.pdf/9582330)

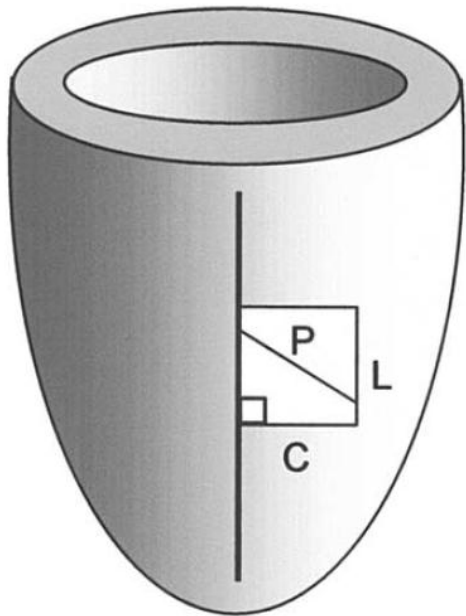

ED

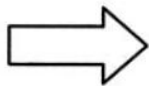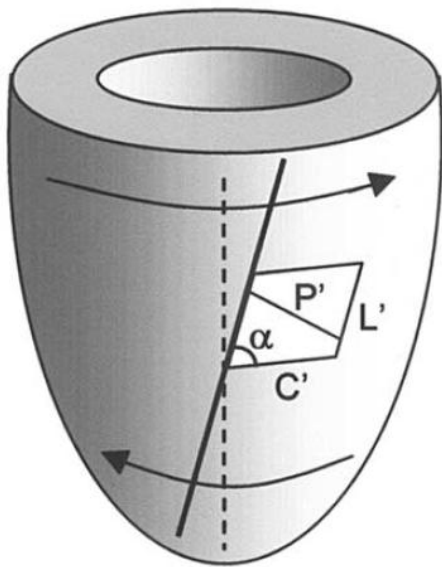

ES

Supplement: MOESM3 [file 9582330]
